# Supplementary material for: Disentangling direct and indirect effects of local temperature on abundance of mountain birds and implications for understanding global change impacts
Source: PeerJ journal article supplement (doi:10.7717/peerj.12560), 2021-12-03

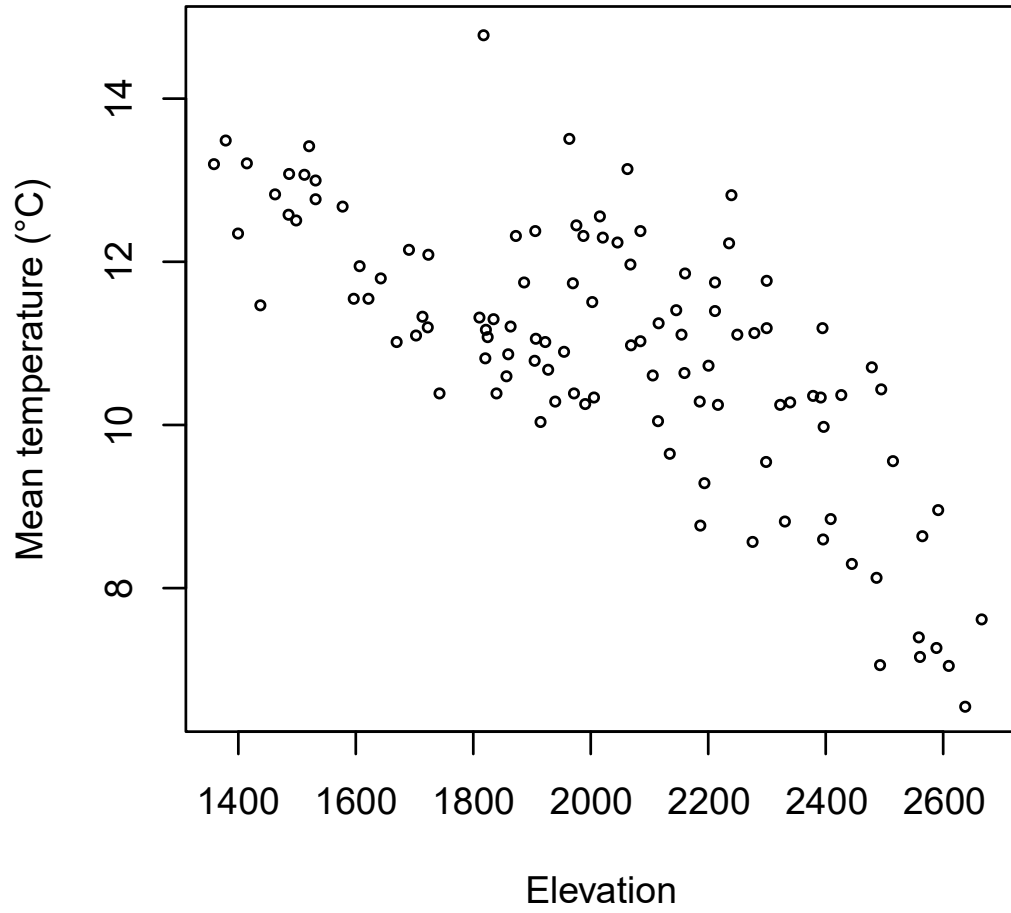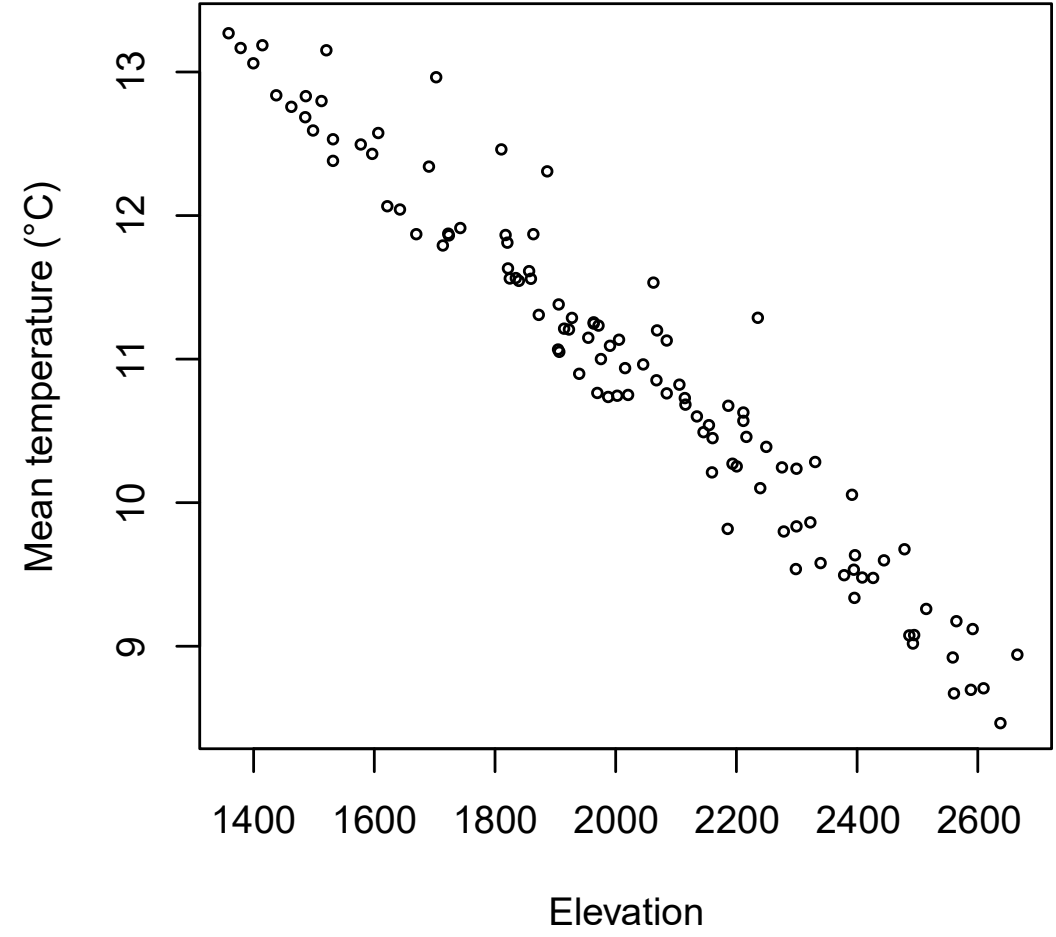

Supplement: Fig.S1.pdf [file Fig.S1.pdf]
