# Supplementary material for: Disentangling direct and indirect effects of local temperature on abundance of mountain birds and implications for understanding global change impacts
Source: PeerJ. 2021 Dec 3;9:e12560. doi: 10.7717/peerj.12560 (PMC8647716; doi:10.7717/peerj.12560)
Supplement: Supplemental Information 3 [file peerj-09-12560-s003.xlsx]

## Sheet: Foglio1
Point ID	Bushes (% cover)	Rocks/scree (% cover)	Larches (% of total canopy cover)	Tree canopy (% cover)	Undergrowth (% cover)	Grassland (% cover)
1	0	0	5	100	0	0
2	0	0	0	85	0	15
3	0	0	5	91	0	10
4	0	0	40	86	0	0
5	0	0	5	75	0	25
6	0	0	1	85	0	15
7	0	0	0	95	0	5
8	0	0	1	95	0	5
9	0	0	10	95	0	5
10	10	0	70	37	0	55
11	0	0	60	90	0	10
12	0	0	50	100	0	0
13	0	0	10	100	0	0
14	0	0	90	100	0	0
15	0	0	1	95	0	5
16	0	0	20	80	0	20
17	1	0	0	36	0	65
18	1	0	100	16	0	85
19	1	0	100	11	0	90
20	1	1	0	2	0	100
21	1	0	0	3	0	100
22	0	0	0	1	0	100
23	1	1	0	0	0	100
24	1	7	0	0	0	93
25	0	25	0	0	0	75
30	0	20	0	0	0	80
31	0	35	0	0	0	65
32	0	60	0	0	0	40
33	0	60	0	0	0	40
34	1	0	100	31	0	65
35	1	0	100	31	0	70
36	1	1	0	1	0	96
37	1	0	0	1	0	100
38	0	20	0	0	0	75
39	0	40	0	0	0	60
40	0	20	0	0	0	75
41	0	35	0	0	0	60
42	0	75	0	0	0	25
43	0	0	70	72	5	25
44	0	0	80	92	0	8
45	0	0	75	100	0	0
46	10	0	99	90	60	0
47	0	0	99	71	70	30
48	30	0	60	1	0	70
49	40	0	60	5	0	55
50	65	0	80	10	0	25
51	10	0	80	55	0	30
52	40	0	0	6	0	56
53	20	0	0	1	0	80
54	15	0	0	0	0	85
55	5	0	0	1	0	95
56	5	0	0	1	0	95
57	10	1	0	0	0	90
58	25	5	0	0	0	70
59	10	10	0	0	0	81
60	1	5	0	0	0	95
61	0	10	0	0	0	90
62	0	10	0	0	0	90
63	0	10	0	0	0	90
64	40	0	0	1	0	60
65	78	0	50	7	0	15
66	1	0	60	8	0	94
67	0	0	60	95	0	1
68	10	0	30	86	0	5
69	1	0	40	96	0	5
70	0	0	30	95	0	0
72	1	0	30	90	0	10
73	0	0	50	95	0	1
74	1	0	50	66	0	35
76	1	0	30	71	0	25
77	0	0	40	92	1	10
78	0	0	30	85	5	15
79	1	0	20	51	0	50
80	0	0	100	80	40	20
81	30	0	100	40	0	30
82	0	0	100	10	0	90
83	0	0	100	6	0	96
84	0	0	85	1	0	100
85	0	0	0	0	0	100
86	0	0	0	0	0	100
87	0	0	0	0	0	100
88	0	0	0	0	0	100
89	0	70	0	0	0	30
90	0	70	0	0	0	30
91	0	25	0	0	0	75
92	0	0	50	100	0	1
93	1	1	70	90	1	10
94	50	5	100	35	0	10
95	30	10	0	6	0	55
96	1	25	0	0	0	70
97	1	45	0	0	0	55
98	0	35	0	0	0	65
99	0	40	0	0	0	60
100	0	30	0	0	0	70
101	0	60	0	0	0	40
102	0	40	0	0	0	60
103	0	25	0	0	0	75
104	0	80	0	0	0	20
105	0	50	0	0	0	50
106	0	75	0	0	0	25
107	0	35	0	0	0	65
112	1	1	0	0	0	100
113	1	5	0	0	0	95
114	30	1	0	0	0	70
115	5	5	0	1	0	90
116	60	15	0	11	0	15
117	30	15	99	40	50	15
118	0	0	90	100	20	0
119	0	0	60	100	0	0
